# Supplementary material for: Climate-controlled root zone parameters show potential to improve water flux simulations by land surface models
Source: Copernicus journal article supplement (doi:10.5194/esd-12-725-2021), 2021-06-21
Supplement: Supplementary file 1 [file esd-12-725-2021-supplement.pdf]

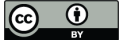

*Supplement of*

## **Climate-controlled root zone parameters show potential to improve water flux simulations by land surface models**

**Fransje van Oorschot et al.**

*Correspondence to:* Fransje van Oorschot ([f.vanoorschot@tudelft.nl](mailto:f.vanoorschot@tudelft.nl))

The copyright of individual parts of the supplement might differ from the article licence.

## 1. Catchment information

Table S1. Study catchment characteristics (Australian Bureau of Meteorology; <http://www.bom.gov.au/water/hrs/>). Soil type is based on the FAO soil map of the world (FAO, 2003) and vegetation characteristics from GLCC1.2 (ECMWF, 2016) with  $T_L$  and  $T_H$  the dominant low and high vegetation types and  $C_L$  and  $C_H$  the fractional coverage of low and high vegetation.

| Catchment name            | Station ID | Coordinates            | Climate region | Area (km <sup>2</sup> ) | Soil type   | $T_L$                | $T_H$               | $C_L$ (-) | $C_H$ (-) |
|---------------------------|------------|------------------------|----------------|-------------------------|-------------|----------------------|---------------------|-----------|-----------|
| East Alligator River (EA) | G8210010   | 133.332°E,<br>12.717°S | Tropical       | 2398                    | coarse      | Tall grass           | Interrupted forest  | 0.68      | 0.32      |
| East Baines River (EB)    | G8110004   | 130.034°E,<br>15.766°S | Tropical       | 2443                    | coarse      | Semidesert           |                     | 1.00      | 0.00      |
| Gregory River (G)         | 912101A    | 139.252°E,<br>18.643°S | Tropical       | 12652                   | medium fine | Short grass          |                     | 1.00      | 0.00      |
| Herbert River (He)        | 116006B    | 145.922°E,<br>18.491°S | Tropical       | 7487                    | medium fine | Tall grass           | Evergreen broadleaf | 0.01      | 0.99      |
| Mitchell River (Mi)       | 919003A    | 144.290°E,<br>16.472°S | Tropical       | 7734                    | coarse      | Tall grass           | Interrupted forest  | 0.43      | 0.57      |
| Normanby River (No)       | 105101A    | 144.839°E,<br>15.281°S | Tropical       | 2306                    | coarse      | Tall grass           | Interrupted forest  | 0.01      | 0.99      |
| Wenlock River (W)         | 925001A    | 142.638°E,<br>12.454°S | Tropical       | 3290                    | medium fine |                      | Interrupted forest  | 0.00      | 1.00      |
| Abercrombie River (A)     | 412028     | 149.325°E,<br>33.955°S | Temperate      | 2631                    | medium      | Crops, mixed farming | Interrupted forest  | 0.23      | 0.76      |
| Dogwood Creek (D)         | 422202B    | 150.179°E,<br>26.709°S | Temperate      | 2882                    | medium fine | Tall grass           | Evergreen broadleaf | 0.14      | 0.86      |
| Murrumbidgee River (Mu)   | 410761     | 149.101°E,<br>35.540°S | Temperate      | 5158                    | medium fine | Tall grass           | Interrupted forest  | 0.16      | 0.84      |
| Namoi River (Na)          | 419005     | 150.778°E,<br>30.678°S | Temperate      | 2532                    | medium      | Crops, mixed farming | Interrupted forest  | 0.33      | 0.67      |
| Paroo River (P)           | 424201A    | 144.786°E,<br>28.689°S | Temperate      | 22885                   | medium      | Semidesert           |                     | 1.00      | 0.00      |
| Avoca River (Av)          | 408200     | 143.299°E,<br>36.438°S | Mediterranean  | 2677                    | medium      | Crops, mixed farming | Interrupted forest  | 0.79      | 0.21      |
| Kent River (K)            | 604053     | 117.087°E,<br>34.888°S | Mediterranean  | 1786                    | coarse      | Crops, mixed farming | Interrupted forest  | 0.65      | 0.35      |
| Reedy Creek (R)           | 403209A    | 146.345°E,<br>36.332°S | Mediterranean  | 5506                    | medium fine | Crops, mixed farming | Evergreen broadleaf | 0.02      | 0.98      |

Table S2. Hydrological characteristics of the study catchments with long-term (1973–2010) annual mean values for precipitation ( $\bar{P}$ ), discharge ( $\bar{Q}$ ) and potential evaporation ( $\bar{E}_p$ ), aridity index ( $I_A$ ), seasonality index ( $I_S$ ), time-lag between maximum monthly mean precipitation and potential evaporation ( $\varphi$ ) and root zone storage capacity estimates from the memory method ( $S_{r,MM}$ ) and in the HTESEL CTR model ( $S_{r,CTR}$ ).

| Catchment | $\bar{P}$ (mm year <sup>-1</sup> ) | $\bar{Q}$ (mm year <sup>-1</sup> ) | $\bar{E}_p$ (mm year <sup>-1</sup> ) | $I_A$ (-) | $I_S$ (-) | $\varphi$ (months) | $S_{r,MM}$ (mm) | $S_{r,CTR}$ (mm) |
|-----------|------------------------------------|------------------------------------|--------------------------------------|-----------|-----------|--------------------|-----------------|------------------|
| EA        | 1539                               | 586                                | 953                                  | 1.31      | 0.97      | 3                  | 389             | 535              |
| EB        | 879                                | 134                                | 745                                  | 2.53      | 0.99      | 3                  | 300             | 535              |
| G         | 509                                | 55                                 | 453                                  | 3.96      | 0.95      | 1                  | 194             | 513              |
| He        | 1140                               | 326                                | 814                                  | 1.46      | 0.70      | 2                  | 409             | 725              |
| Mi        | 854                                | 251                                | 603                                  | 2.05      | 0.89      | 2                  | 410             | 535              |
| No        | 1207                               | 288                                | 920                                  | 1.40      | 0.85      | 2                  | 722             | 535              |
| W         | 1577                               | 472                                | 1105                                 | 1.10      | 0.95      | 3                  | 633             | 725              |
| A         | 787                                | 94                                 | 693                                  | 1.55      | 0.07      | 0                  | 208             | 566              |
| D         | 661                                | 24                                 | 637                                  | 2.69      | 0.38      | 0                  | 266             | 725              |
| Mu        | 588                                | 59                                 | 530                                  | 2.04      | 0.08      | 2                  | 205             | 725              |
| Na        | 802                                | 84                                 | 718                                  | 1.76      | 0.26      | 0                  | 165             | 566              |
| P         | 417                                | 26                                 | 392                                  | 4.38      | 0.37      | 1                  | 125             | 566              |
| Av        | 505                                | 8                                  | 497                                  | 2.69      | 0.25      | 5                  | 160             | 566              |
| K         | 889                                | 41                                 | 848                                  | 1.36      | 0.50      | 6                  | 315             | 535              |
| R         | 1243                               | 109                                | 1133                                 | 1.02      | 0.26      | 6                  | 487             | 725              |

## 2. Reference and modeled long-term annual mean fluxes

Table S3. Long-term (1975–2010) annual mean reference and modeled (HTESSEL CTR and MD models) precipitation ( $\bar{P}$ ), discharge ( $\bar{Q}$ ) and evaporation ( $\bar{E}$ ) fluxes in the study catchments.

| Catchment | $\bar{P}$ (mm year <sup>-1</sup> ) | $\bar{Q}$ (mm year <sup>-1</sup> ) |     |     | $\bar{E}$ (mm year <sup>-1</sup> ) |         |      |     |
|-----------|------------------------------------|------------------------------------|-----|-----|------------------------------------|---------|------|-----|
|           | GSWP-3                             | Station observations               | CTR | MD  | Water balance                      | FLUXCOM | CTR  | MD  |
| EA        | 1429                               | 590                                | 423 | 436 | 839                                | 753     | 1002 | 989 |
| EB        | 788                                | 132                                | 176 | 167 | 656                                | 587     | 612  | 621 |
| G         | 514                                | 50                                 | 19  | 42  | 464                                | 434     | 498  | 471 |
| He        | 1051                               | 309                                | 198 | 236 | 742                                | 694     | 847  | 808 |
| Mi        | 1155                               | 231                                | 256 | 264 | 923                                | 622     | 891  | 883 |
| No        | 1405                               | 270                                | 570 | 597 | 1135                               | 765     | 827  | 801 |
| W         | 1538                               | 455                                | 675 | 675 | 1082                               | 900     | 856  | 857 |
| A         | 769                                | 87                                 | 69  | 85  | 682                                | 634     | 702  | 682 |
| D         | 674                                | 25                                 | 34  | 36  | 648                                | 586     | 638  | 635 |
| Mu        | 686                                | 60                                 | 77  | 96  | 626                                | 464     | 615  | 590 |
| Na        | 889                                | 84                                 | 96  | 110 | 805                                | 658     | 790  | 778 |
| P         | 394                                | 24                                 | 18  | 22  | 370                                | 333     | 372  | 371 |
| Av        | 531                                | 7                                  | 6   | 20  | 524                                | 449     | 529  | 511 |
| K         | 1066                               | 41                                 | 200 | 200 | 1024                               | 730     | 867  | 866 |
| R         | 1056                               | 98                                 | 305 | 312 | 958                                | 709     | 755  | 749 |

Table S4. Percent biases of modeled (HTESSEL CTR and MD models) long-term (1975–2010) annual mean discharge ( $\bar{Q}$ ) and evaporation ( $\bar{E}$ ) with for  $\bar{Q}$  station observations as reference data and for  $\bar{E}$  water balance and FLUXCOM as reference data.

| Catchment | $\bar{Q}$ (mm year <sup>-1</sup> ) |      | $\bar{E}$ (mm year <sup>-1</sup> ) |        |         |       |
|-----------|------------------------------------|------|------------------------------------|--------|---------|-------|
|           | Station observations               |      | Water balance                      |        | FLUXCOM |       |
|           | CTR                                | MD   | CTR                                | MD     | CTR     | MD    |
| EA        | -28%                               | -26% | 19.4%                              | 17.9%  | 32.9%   | 31.3% |
| EB        | 33%                                | 26%  | -6.7%                              | -5.3%  | 4.3%    | 5.7%  |
| G         | -63%                               | -14% | 7.3%                               | 1.5%   | 14.8%   | 8.6%  |
| He        | -36%                               | -24% | 14.2%                              | 8.9%   | 22.0%   | 16.3% |
| Mi        | 11%                                | 14%  | -3.5%                              | -4.4%  | 43.2%   | 41.9% |
| No        | 111%                               | 121% | -27.1%                             | -29.4% | 8.0%    | 4.6%  |
| W         | 48%                                | 48%  | -20.9%                             | -20.8% | -4.9%   | -4.8% |
| A         | -20%                               | -2%  | 3.0%                               | 0.0%   | 10.7%   | 7.6%  |
| D         | 34%                                | 41%  | -1.6%                              | -2.0%  | 8.8%    | 8.4%  |
| Mu        | 28%                                | 60%  | -1.7%                              | -5.7%  | 32.7%   | 27.3% |
| Na        | 14%                                | 31%  | -1.8%                              | -3.4%  | 20.1%   | 18.2% |
| P         | -25%                               | -6%  | 0.6%                               | 0.2%   | 11.8%   | 11.4% |
| Av        | -9%                                | 196% | 0.9%                               | -2.4%  | 17.6%   | 13.8% |
| K         | 386%                               | 385% | -15.4%                             | -15.4% | 18.7%   | 18.6% |
| R         | 211%                               | 217% | -21.2%                             | -21.8% | 6.5%    | 5.6%  |



### 3. Model results monthly discharge

Table S5. Model performance based on monthly modeled (HTESSEL CTR and MD models) discharge fluxes compared to station observations with Pearson correlation ( $r$ ) and variability ( $\alpha = \sigma_{mod} / \sigma_{obs}$ ) for inter-annual anomalies of monthly discharge fluxes and of monthly seasonal climatology of discharge fluxes for the time series 1975–2010 in the study catchments. For both  $r$  and  $\alpha$  a value of 1 corresponds to a perfect model fit. The significance test of the MD improvements compared to CTR is represented by \*\* (passing 5% level) and \* (passing 10% level) and additionally P-values are provided for the cases that MD improves compared to CTR.

| Catchment | Monthly seasonal climatology |        |         |              |        |         | Inter-annual anomalies |        |         |              |        |         |
|-----------|------------------------------|--------|---------|--------------|--------|---------|------------------------|--------|---------|--------------|--------|---------|
|           | $r$ (-)                      |        |         | $\alpha$ (-) |        |         | $r$ (-)                |        |         | $\alpha$ (-) |        |         |
|           | CTR                          | MD     | P-value | CTR          | MD     | P-value | CTR                    | MD     | P-value | CTR          | MD     | P-value |
| EA        | 0.63                         | 0.77** | 0.001   | 0.79         | 0.87** | 0.045   | 0.61                   | 0.65** | 0.002   | 1.02         | 1.07   | -       |
| EB        | 0.60                         | 0.92** | <0.001  | 0.73         | 1.11*  | 0.069   | 0.52                   | 0.71** | <0.001  | 0.79         | 1.06** | <0.001  |
| G         | 0.96                         | 0.98   | 0.337   | 0.46         | 1.14** | 0.05    | 0.85                   | 0.86   | 0.39    | 0.47         | 1.65   | -       |
| He        | 0.98                         | 0.99   | 0.281   | 0.58         | 0.63*  | 0.10    | 0.86                   | 0.87   | 0.342   | 0.68         | 0.74** | <0.001  |
| Mi        | 0.83                         | 0.87   | 0.178   | 0.84         | 1.00** | 0.003   | 0.64                   | 0.71** | <0.001  | 0.93         | 1.09   | -       |
| No        | 0.91                         | 0.82   | -       | 1.71         | 1.55** | 0.022   | 0.86                   | 0.80   | -       | 1.52         | 1.39** | <0.001  |
| W         | 0.99                         | 0.99   | -       | 1.31         | 1.37   | -       | 0.85                   | 0.85   | -       | 1.35         | 1.39   | -       |
| A         | 0.94                         | 0.99   | 0.206   | 0.39         | 0.84** | <0.001  | 0.83                   | 0.90** | 0.03    | 0.50         | 0.85** | <0.001  |
| D         | 0.74                         | 0.73   | -       | 1.47         | 1.39** | 0.001   | 0.77                   | 0.78** | <0.001  | 0.91         | 0.93** | 0.006   |
| Mu        | 0.90                         | 0.97   | 0.074   | 0.63         | 1.49   | -       | 0.88                   | 0.94** | 0.007   | 0.84         | 1.45   | -       |
| Na        | 0.21                         | 0.62** | 0.022   | 0.76         | 0.72   | -       | 0.72                   | 0.84** | <0.001  | 0.65         | 0.84** | <0.001  |
| P         | 0.92                         | 0.98** | 0.002   | 0.77         | 1.03** | 0.023   | 0.78                   | 0.79   | 0.421   | 0.81         | 1.23   | -       |
| Av        | 0.88                         | 0.95   | 0.319   | 0.55         | 3.64   | -       | 0.67                   | 0.71   | 0.255   | 0.81         | 3.39   | -       |
| K         | 0.75                         | 0.95** | <0.001  | 3.77         | 5.22   | -       | 0.62                   | 0.76** | 0.002   | 2.55         | 3.47   | -       |
| R         | 0.96                         | 0.98** | 0.018   | 1.72         | 2.20   | -       | 0.83                   | 0.89** | <0.001  | 1.72         | 1.99   | -       |

Figure S1: Monthly anomalies (left) and monthly seasonal climatology (right) of modeled discharge with the HTESSSEL CTR and MD models compared to discharge from station observations in the study catchments (Table S1). Monthly anomaly discharge is presented for the time series 1990-2010 and monthly seasonal climatology is based on the time series of 1975-2010.

(a) EA

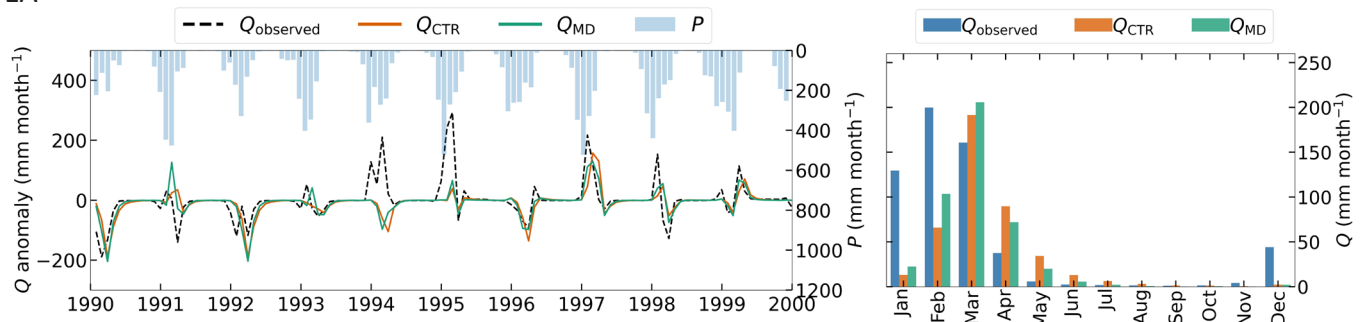

(b) EB

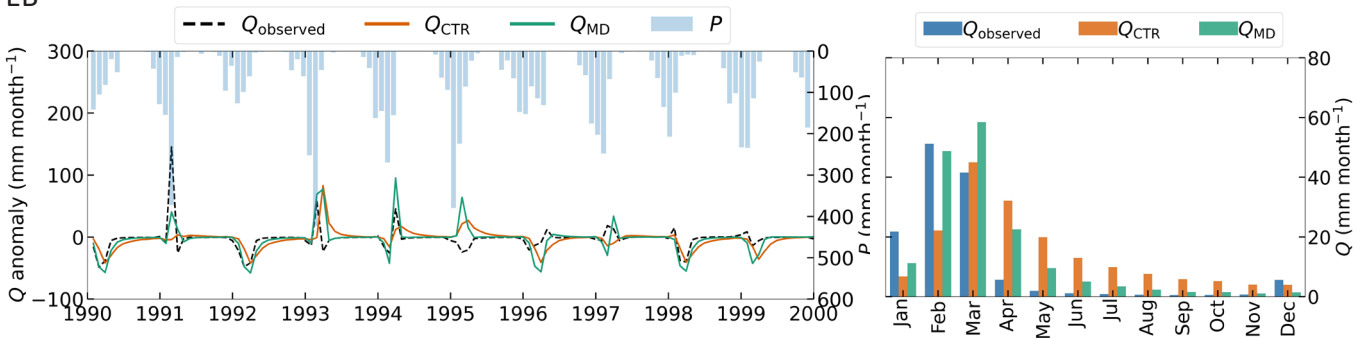

(c) G

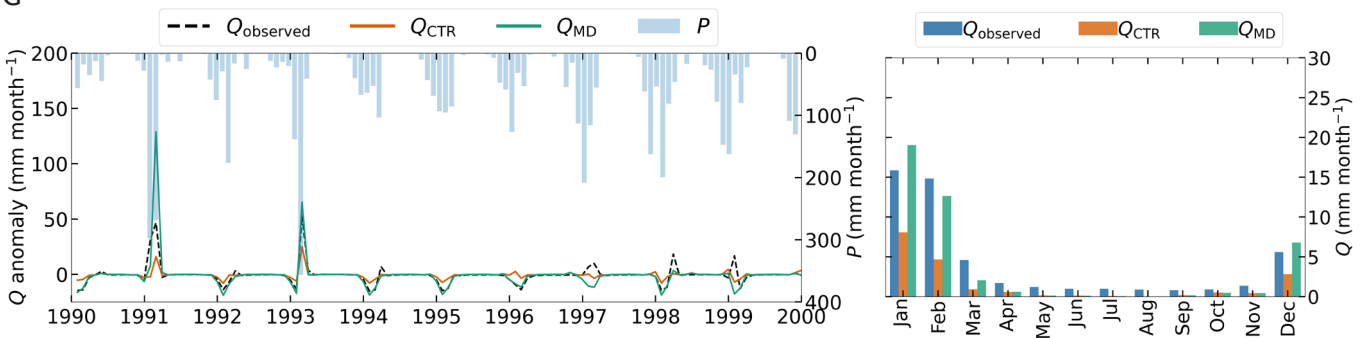

(d) He

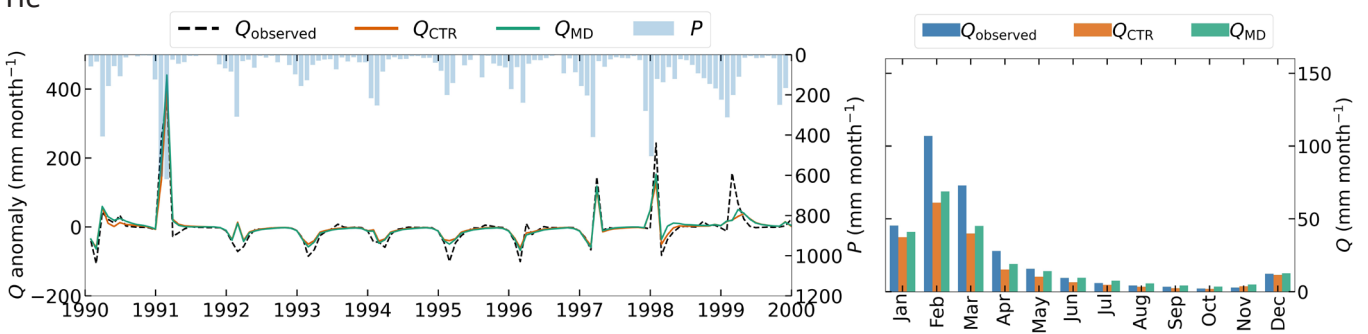

(e) Mi

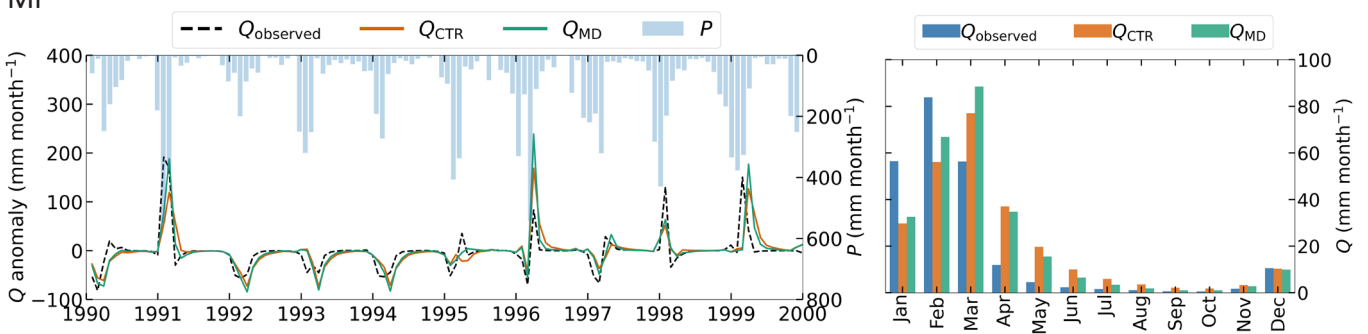

(f) No

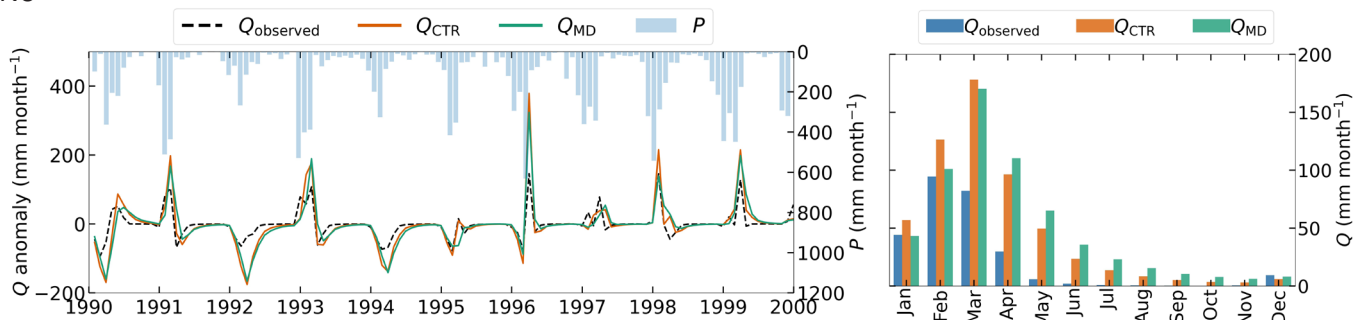

(g) W

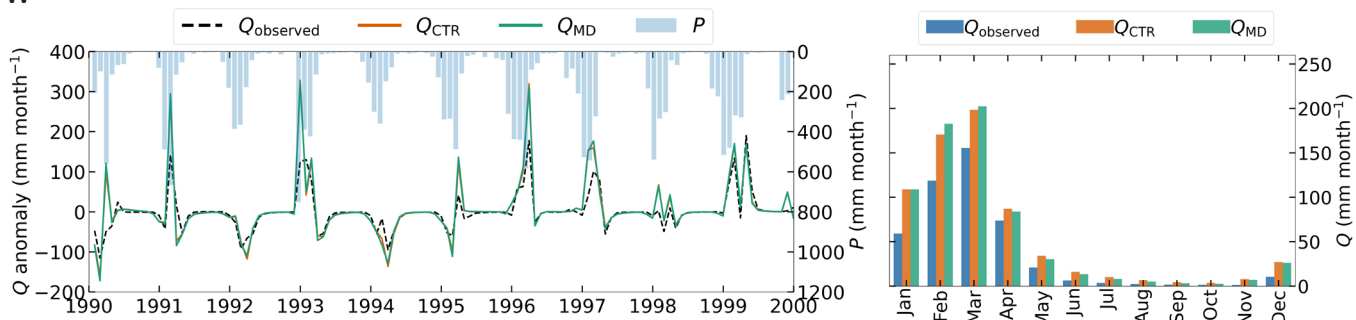

(h) A

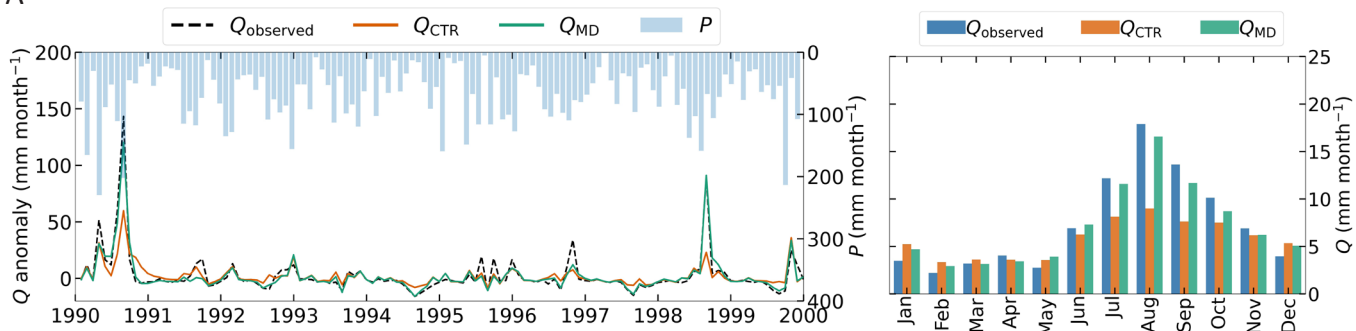

(i) D

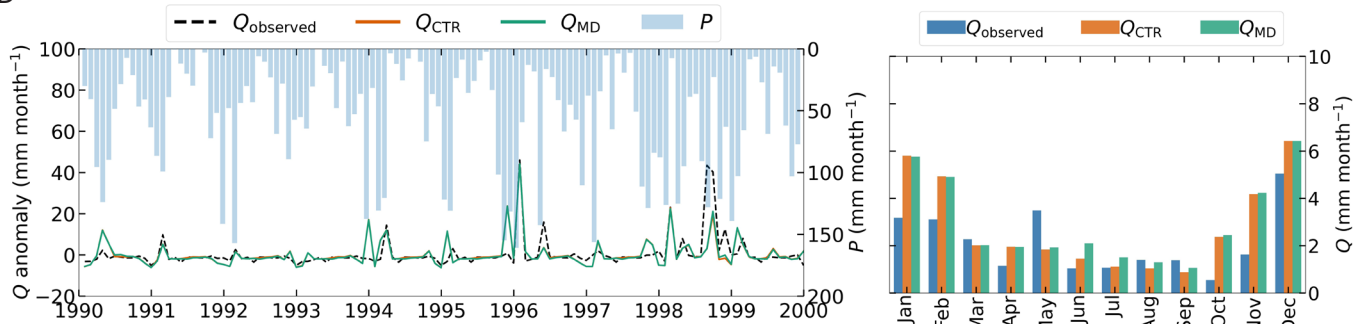

(j) Na

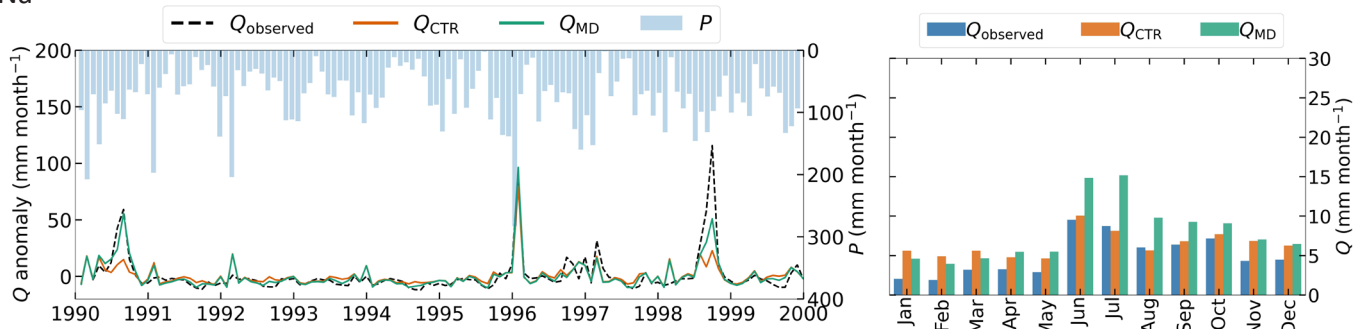

(k) Mu

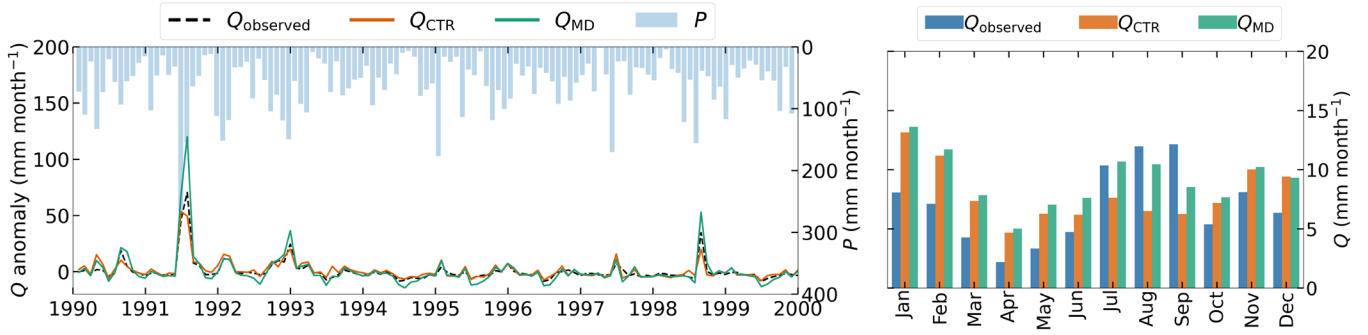

(l) P

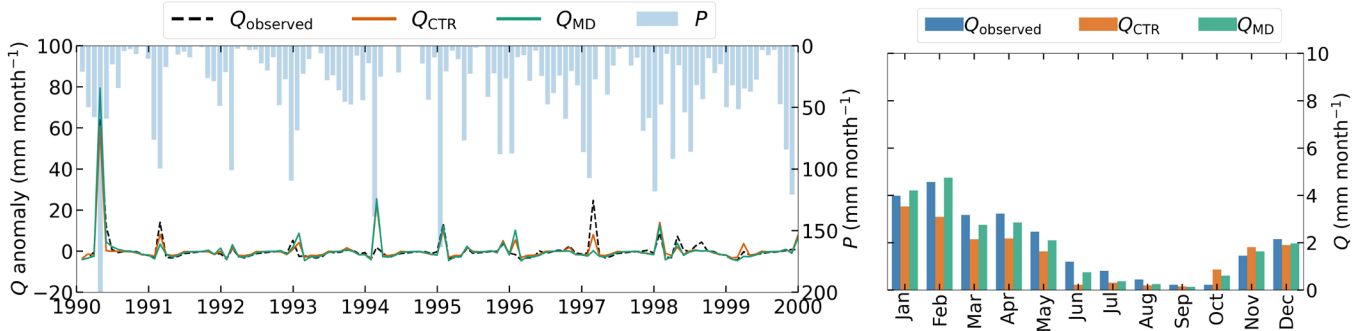

(m) Av

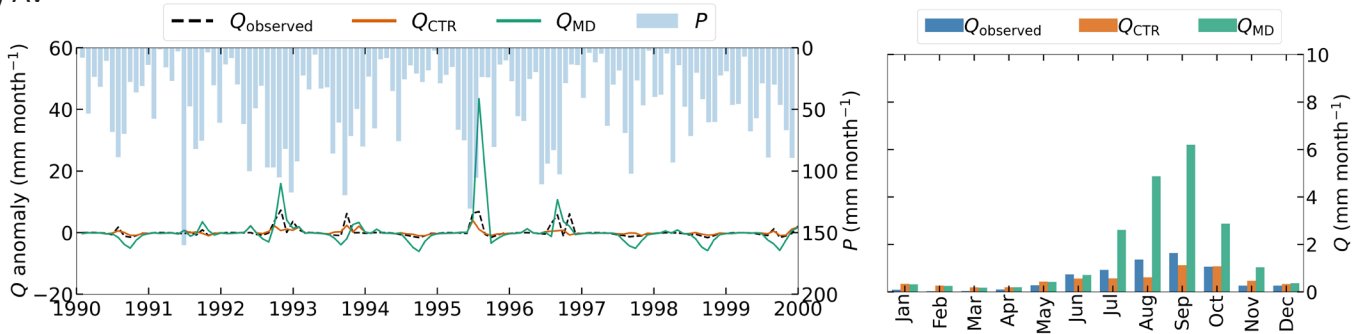

(n) K

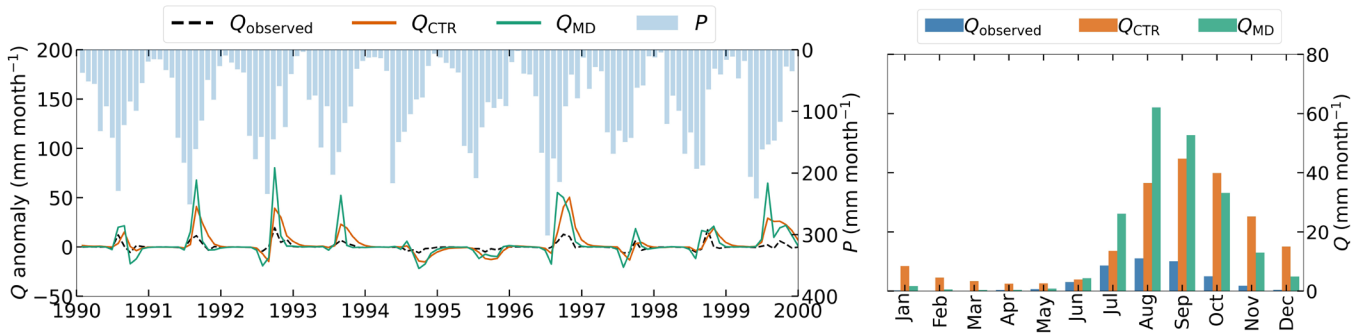

(o) R

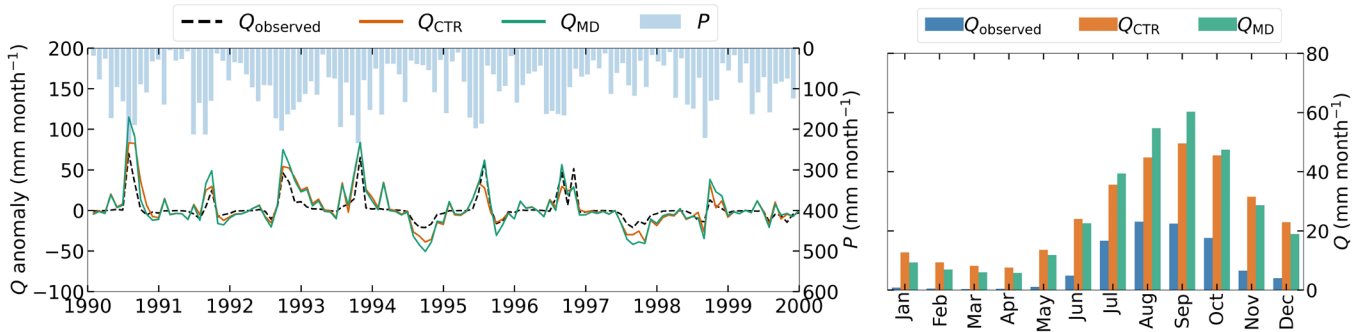

## 4. Model results monthly evaporation

Table S6. Model performance based on monthly modeled (HTESSEL CTR and MD models) evaporation fluxes compared to FLUXCOM-WB with Pearson correlation ( $r$ ) and variability ( $\alpha = \sigma_{mod}/\sigma_{obs}$ ) for inter-annual anomalies of monthly evaporation fluxes and of monthly seasonal climatology evaporation for the time series 1975–2010 in the study catchments. For both  $r$  and  $\alpha$  a value of 1 corresponds to a perfect model fit. The significance test of the MD improvements compared to CTR is represented by \*\* (passing 5% level) and \* (passing 10% level) and additionally P-values are provided for the cases that MD improves compared to CTR.

|           | Monthly seasonal climatology |        |         |              |        |         | Inter-annual anomalies |        |         |              |       |         |
|-----------|------------------------------|--------|---------|--------------|--------|---------|------------------------|--------|---------|--------------|-------|---------|
|           | $r$ (-)                      |        |         | $\alpha$ (-) |        |         | $r$ (-)                |        |         | $\alpha$ (-) |       |         |
| Catchment | CTR                          | MD     | P-value | CTR          | MD     | P-value | CTR                    | MD     | P-value | CTR          | MD    | P-value |
| EA        | 0.99                         | 0.98   | -       | 1.22         | 1.23   | -       | 0.81                   | 0.81   | -       | 2.12         | 2.16  | -       |
| EB        | 0.99                         | 0.99   | -       | 1.18         | 1.17** | 0.004   | 0.70                   | 0.70   | -       | 2.57         | 2.57* | 0.072   |
| G         | 0.99                         | 0.99   | -       | 1.40         | 1.45   | -       | 0.82                   | 0.83** | 0.001   | 3.30         | 3.40  | -       |
| He        | 0.99                         | 0.98   | -       | 0.88         | 0.97** | 0.015   | 0.71                   | 0.75** | <0.001  | 1.72         | 1.89  | -       |
| Mi        | 0.98                         | 0.97   | -       | 0.69         | 0.69   | -       | 0.83                   | 0.83   | -       | 1.36         | 1.38  | -       |
| No        | 0.98                         | 0.99   | 0.154   | 0.65         | 0.68** | 0.002   | 0.85                   | 0.83   | -       | 1.19         | 1.23  | -       |
| W         | 0.98                         | 0.97   | -       | 0.86         | 0.86   | -       | 0.84                   | 0.84   | -       | 1.20         | 1.21  | -       |
| A         | 0.99                         | 0.98   | -       | 0.96         | 0.94   | -       | 0.86                   | 0.86*  | 0.064   | 1.88         | 2.05  | -       |
| D         | 0.99                         | 0.99   | -       | 0.73         | 0.72   | -       | 0.84                   | 0.84   | -       | 1.52         | 1.64  | -       |
| Mu        | 0.99                         | 0.98   | -       | 0.87         | 0.82   | -       | 0.82                   | 0.85** | <0.001  | 1.32         | 1.50  | -       |
| Na        | 1.00                         | 1.00   | -       | 0.79         | 0.75   | -       | 0.79                   | 0.80** | 0.05    | 1.88         | 2.17  | -       |
| P         | 0.98                         | 0.97   | -       | 0.77         | 0.76   | -       | 0.73                   | 0.73   | 0.281   | 2.92         | 3.05  | -       |
| Av        | 0.94                         | 0.89   | -       | 1.07         | 1.14   | -       | 0.82                   | 0.82   | 0.222   | 2.28         | 2.40  | -       |
| K         | 0.51                         | 0.53** | 0.031   | 0.60         | 0.64** | <0.001  | 0.66                   | 0.67   | 0.149   | 2.29         | 2.31  | -       |
| R         | 0.99                         | 0.99   | -       | 0.74         | 0.74   | 0.486   | 0.86                   | 0.85   | -       | 1.46         | 1.51  | -       |

Figure S2: Monthly anomalies (left) and monthly seasonal climatology (right) of modeled evaporation with the HTESSEL CTR and MD models compared to FLUXCOM-WB evaporation in the study catchments (Table S1). Monthly anomaly evaporation is presented for the time series 1990-2010 and monthly seasonal climatology is based on the time series of 1975-2010.

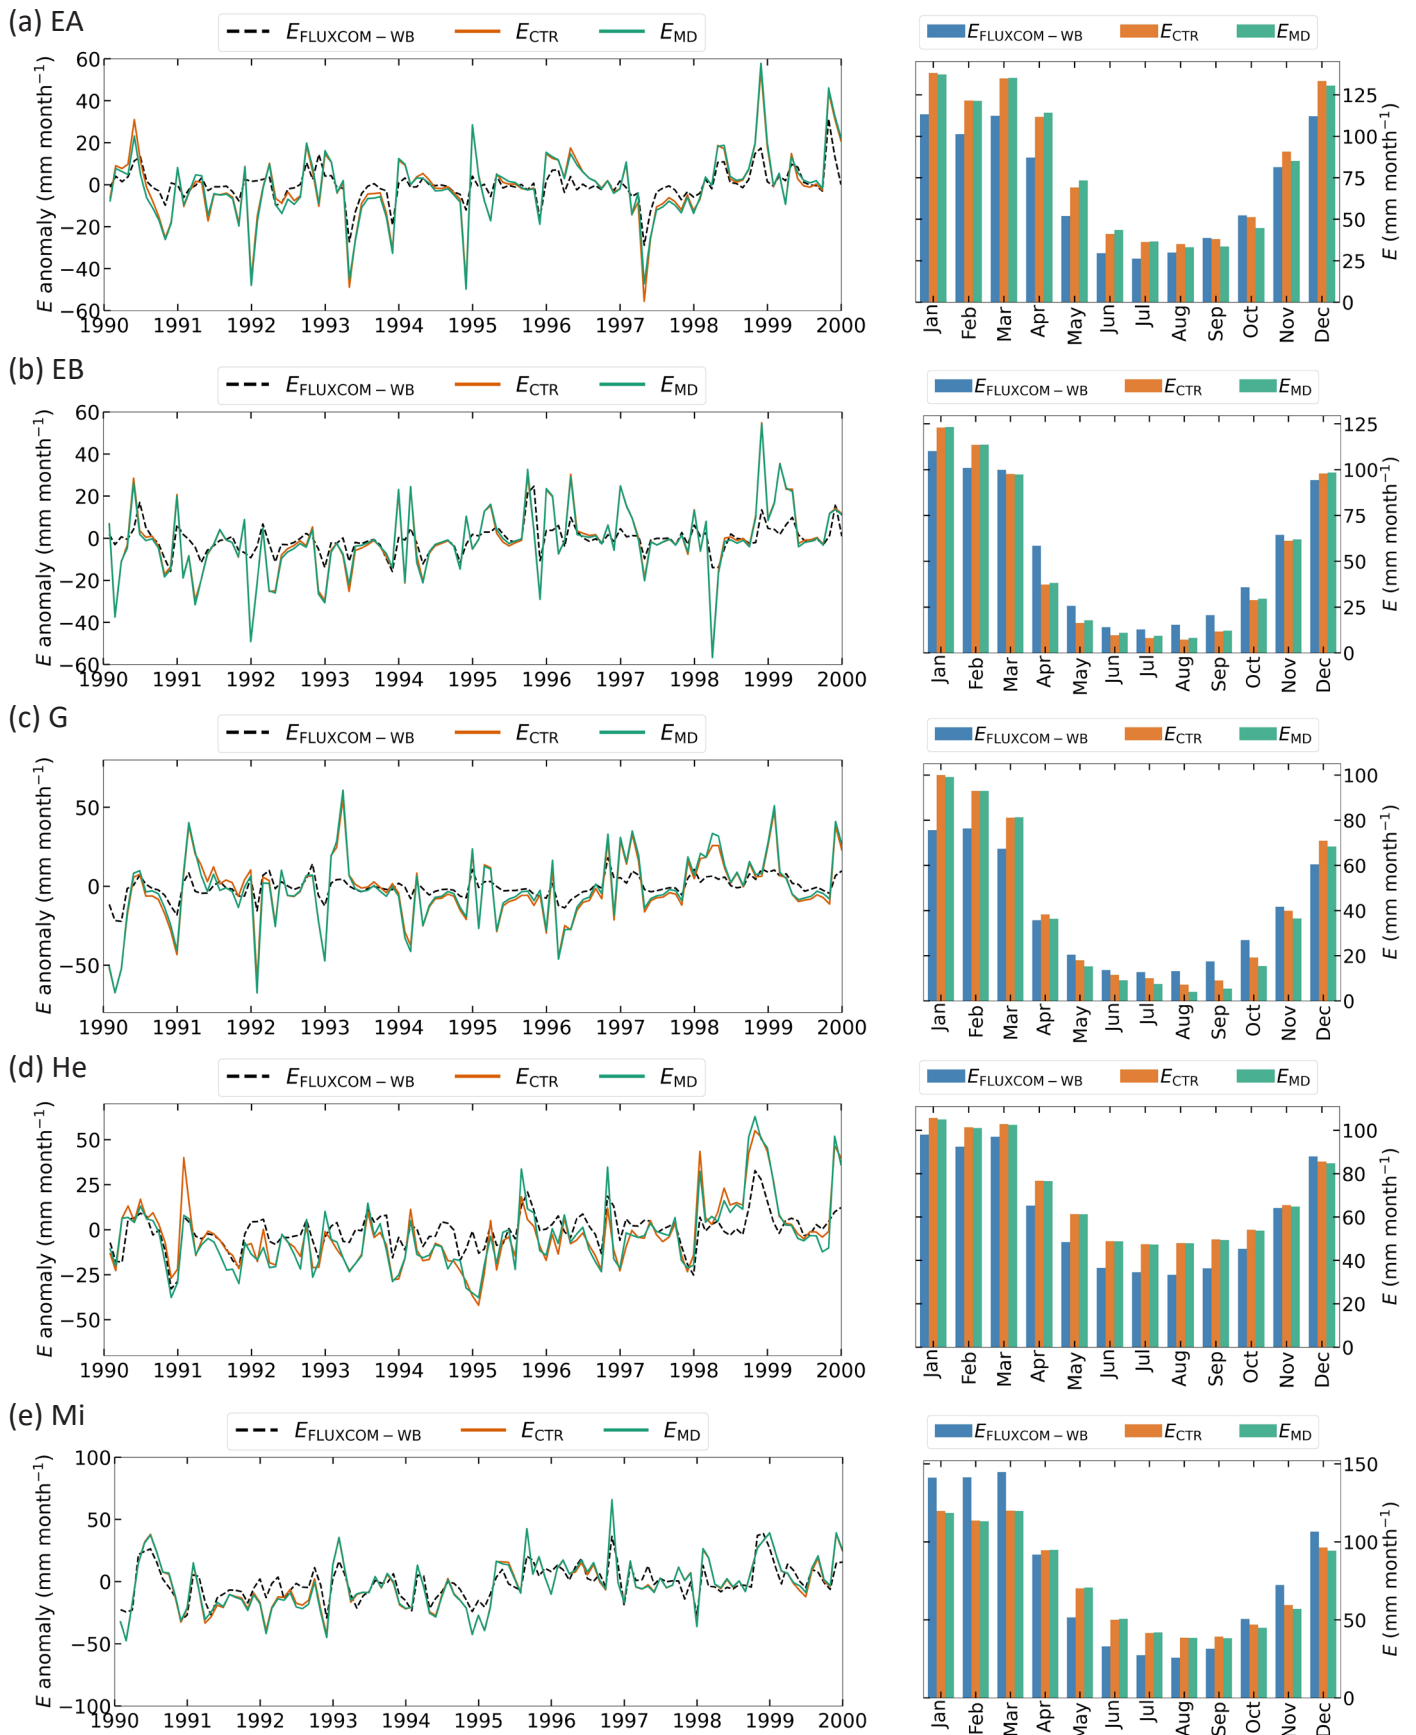

(f) No

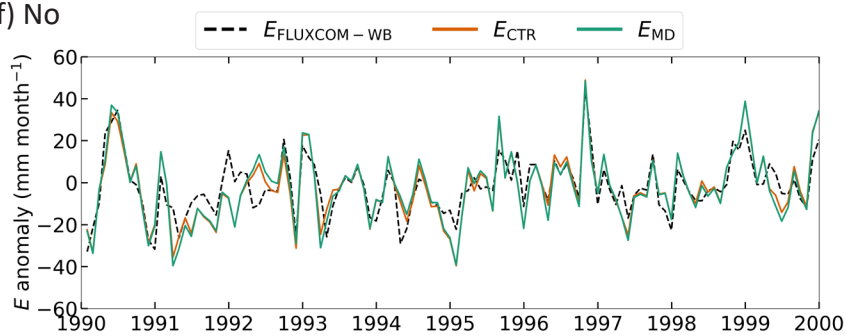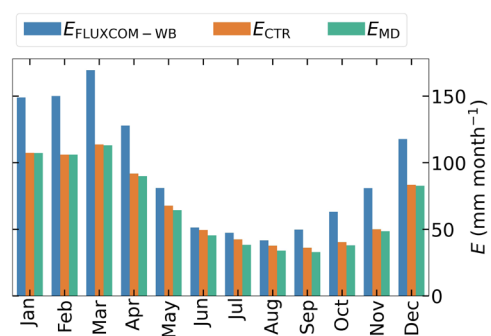

(g) W

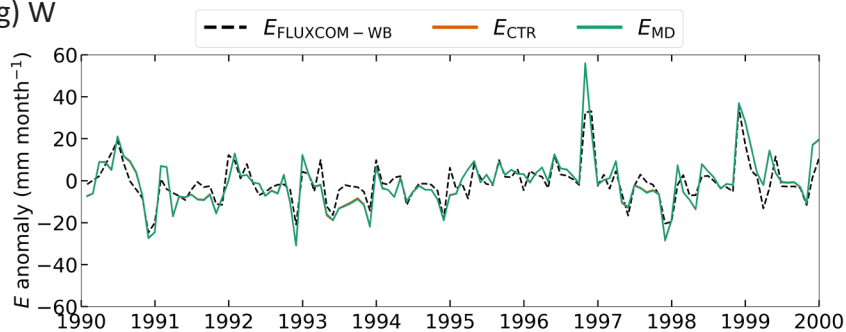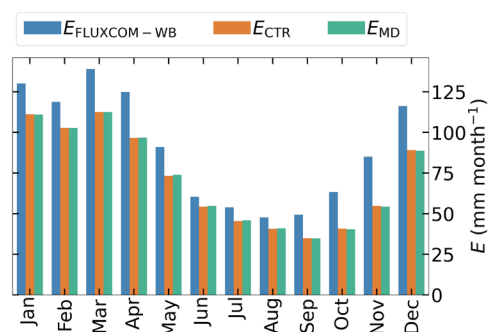

(h) A

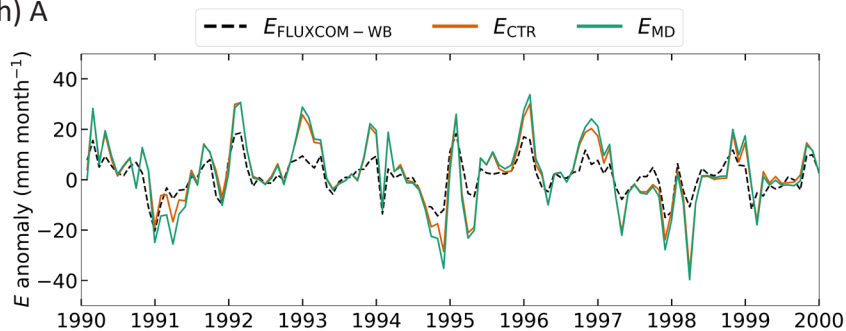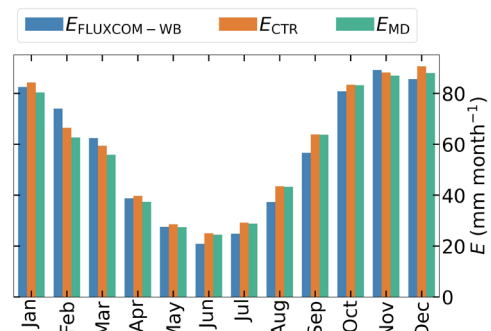

(i) D

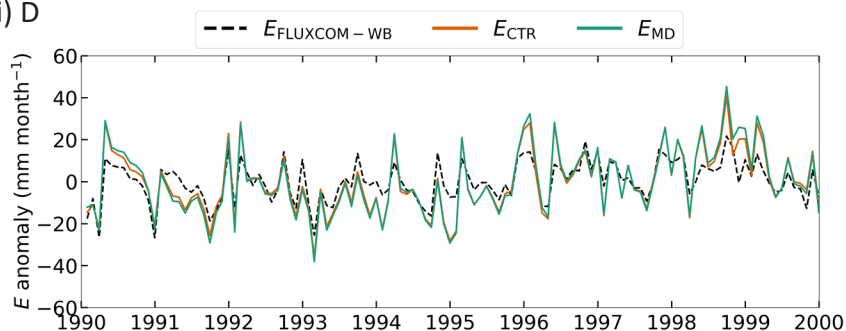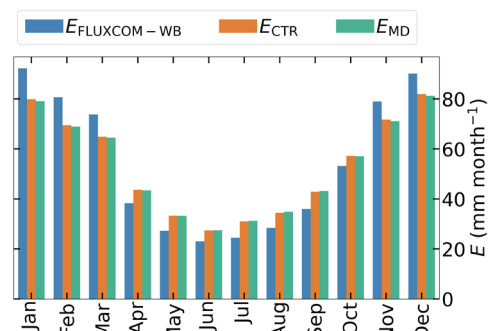

(j) Mu

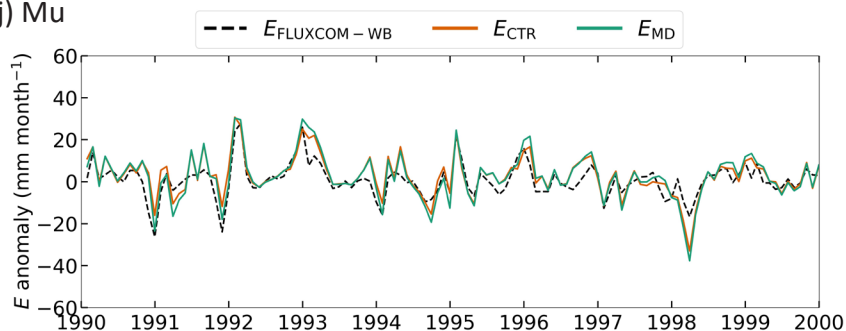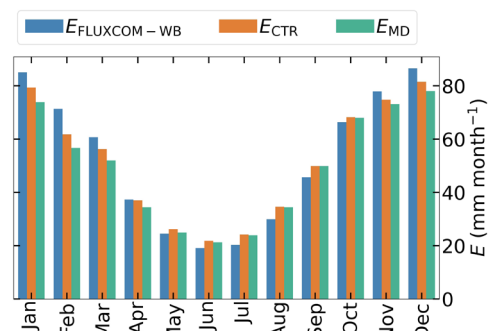



(k) Na

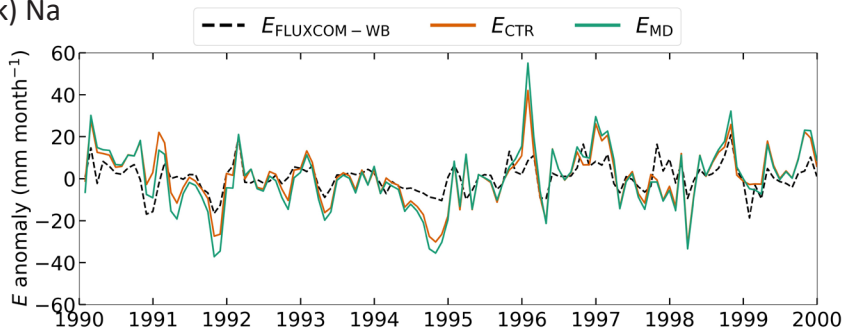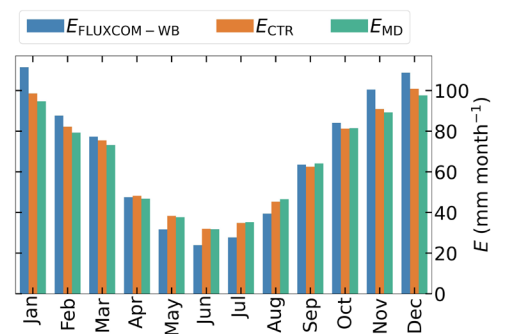

(l) P

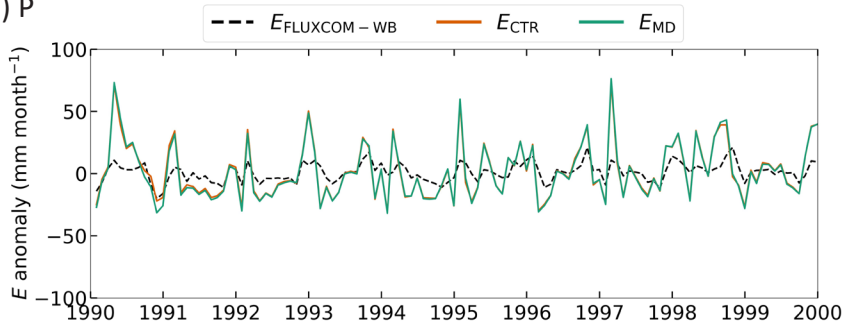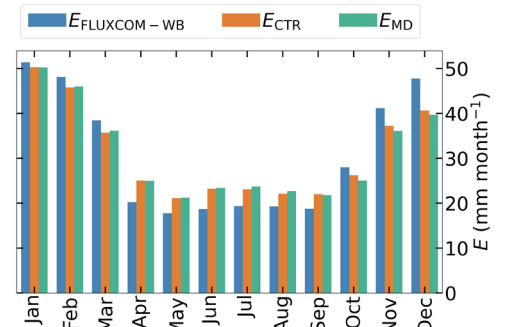

(m) Av

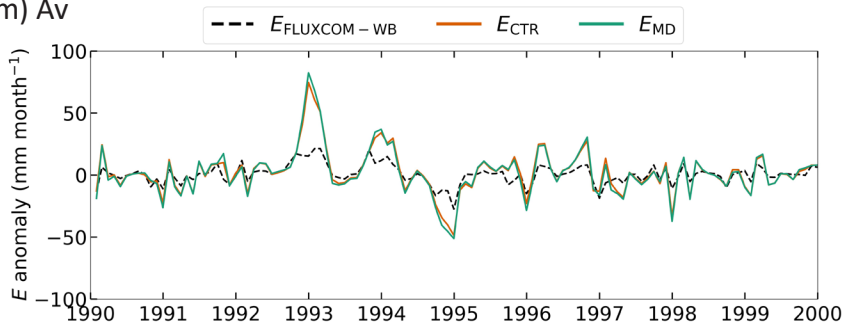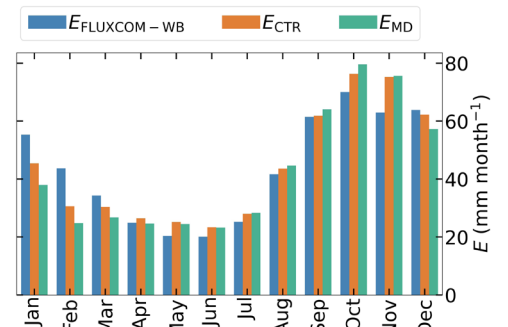

(n) K

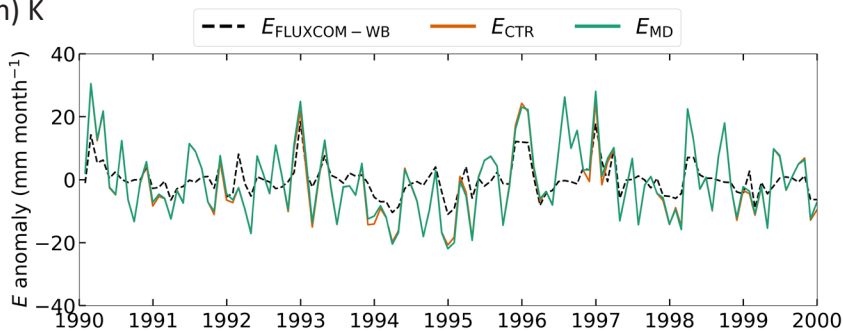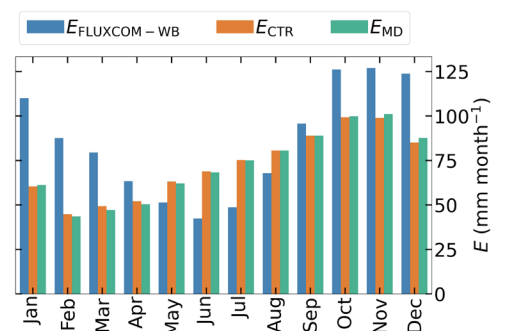

(o) R

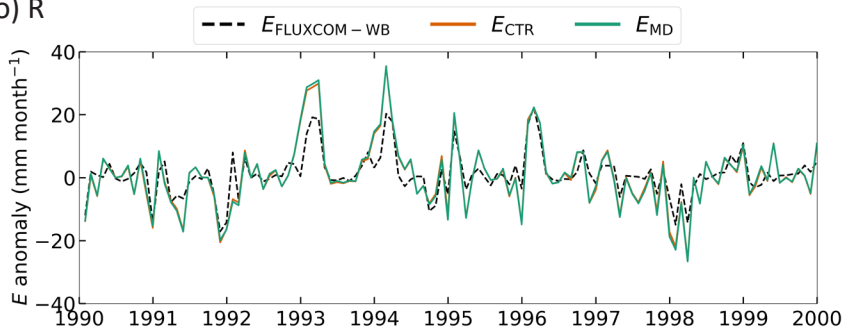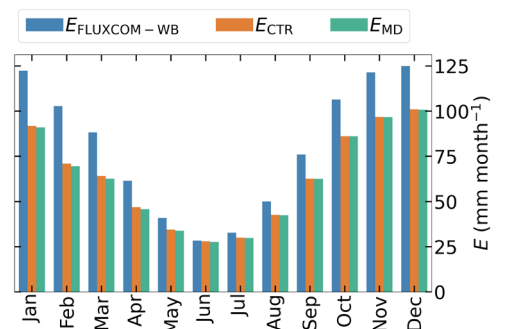



## 5. Effective root zone storage capacity

Figure S3 presents an analysis of the model  $S_r$  computed using the modelled soil moisture deficits and an extreme value analysis as done in the memory method ( $S_{r,eff}$ ). From this figure it is confirmed that the  $S_{r,CTR}$  estimates implied by the model soil depth are larger than the effectively used  $S_r$  in CTR ( $S_{r,CTR,eff}$ ) (Fig. S3c). This is likely related to the relatively small root percentage in layer 4 prescribed from look-up tables in this layer for most vegetation types compared to the other layers. In contrast with the finding that  $S_{r,CTR}$  is larger than  $S_{r,MM}$  in most catchments (Fig. S3a), the  $S_{r,CTR,eff}$  is smaller than  $S_{r,MM}$  in 5 tropical and 2 Mediterranean catchments (Fig. S3b). On the other hand, the  $S_{r,MM}$  we implemented in the MD model is in general close to  $S_{r,MD,eff}$  being based on modelled soil moisture deficits in the MD model, with slightly larger deviations in the aforementioned 5 tropical and 2 Mediterranean catchments (Fig S3d). In follow-up studies on the model  $S_r$  we need to further investigate the role of the root distribution parameter that is likely causing the apparent deviations between the soil depth based  $S_r$  and  $S_{r,eff}$ .

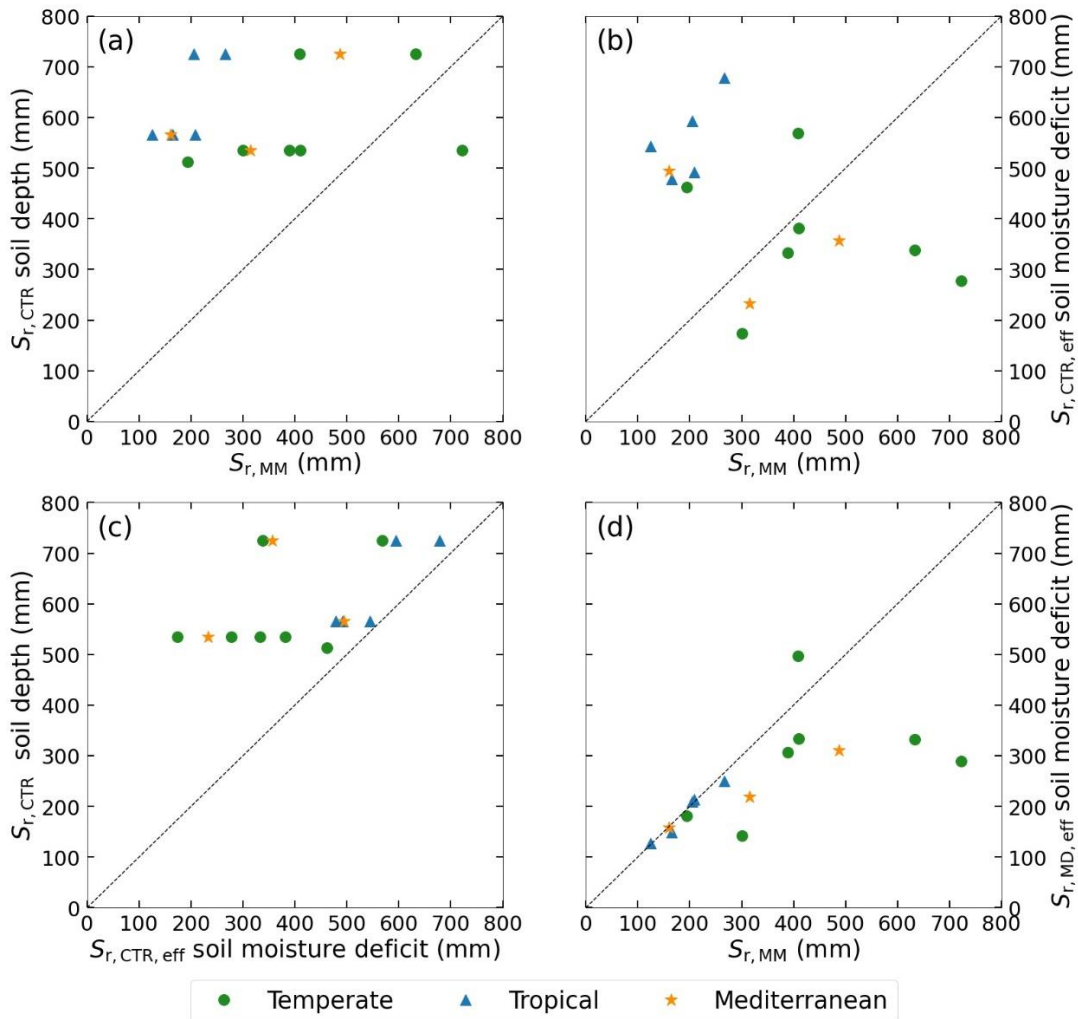

Figure S3. Model  $S_r$  analysis. (a)  $S_{r,MM}$  from the memory method vs.  $S_{r,CTR}$  based on HTESSEL soil depth. (b)  $S_{r,MM}$  from the memory method vs.  $S_{r,CTR,eff}$  based on modelled soil moisture deficits. (c)  $S_{r,CTR}$  based on soil depth vs.  $S_{r,CTR,eff}$  based on modelled soil moisture deficits. (d)  $S_{r,MM}$  from the memory method vs.  $S_{r,MD,eff}$  based on modelled soil moisture deficits
